# Supplementary material for: The Mechanisms of Action of Hyperbaric Oxygen in Restoring Host Homeostasis during Sepsis
Source: MDPI journal article supplement (doi:10.3390/biom13081228), 2023-08-07
Supplement: s1 [file s1]

Table S1 - Studies on the effect of hyperbaric oxygen treatment on HIF-1 $\alpha$ 

| Study                                 | Method                                                       | Outcome                                                                                                                                      | O <sub>2</sub> environment             | Disease under study                  | No. of objects exposed to HBO <sub>2</sub> | Specimen                                                  | HBO treatment                                   |
|---------------------------------------|--------------------------------------------------------------|----------------------------------------------------------------------------------------------------------------------------------------------|----------------------------------------|--------------------------------------|--------------------------------------------|-----------------------------------------------------------|-------------------------------------------------|
| Capo et al. 2023                      | ELISA                                                        | HIF-1 $\alpha$ was increased after HBOT, but reduced 28 days after wound healing                                                             | Relative hypoxic, chronic inflammation | Chronic diabetic wound               | 18                                         | In vivo study of human peripheral blood                   | 2.2 ATA 20 treatments, 5/week 1 hour/day        |
| Xue et al. 2023                       | Western blot ELISA                                           | HBOT, at both 1.5 and 2.5 ATA, reduced the increased levels of HIF-1 $\alpha$ in both brain tissue and serum.                                | Hypoxic, acute inflammation            | Ischemic brain injury                | 24                                         | In vivo rat model, Brain tissue and serum levels          | 1.5 or 2.5 ATA 1 hour 6 days                    |
| Syahrizal et al. 2022                 | Immunohistochemistry                                         | Protein expression of HIF-1 $\alpha$ lower in HBO <sub>2</sub> group compared to inflamed and healthy controls.                              | Relative hypoxic, chronic inflammation | Endometriosis                        | 14                                         | In vivo mouse model                                       | 2.4 ATA 10 days 1,5 hours/day, incl 2 airbreaks |
| Arienti et al. 2021                   | Real time-quantitative PCR and Western blot                  | HBO <sub>2</sub> decreased disease induced elevated levels of HIF-1 $\alpha$ protein and mRNA expression.                                    | Hypoxic, chronic inflammation          | Human glioblastoma                   | 10                                         | Ex vivo study of human fresh tumor tissue                 | 2.5 ATA 1 hour                                  |
| Chen et al. 2021                      | Immunofluorescence and Western blot                          | HBO <sub>2</sub> decreased injury induced elevated levels of HIF-1 $\alpha$ protein expression. Levels remained higher than health controls. | Relative hypoxic, chronic inflammation | Burn injury                          | 6                                          | In vivo rat model                                         | 2.5 ATA 14 days 1,5 hours/day                   |
| Fratantonio et al. 2021               | Western blot                                                 | HBO <sub>2</sub> did not significantly change HIF-1 $\alpha$ protein expression.                                                             | Normoxic, non-inflammation             | Healthy                              | 4                                          | In vivo study of human peripheral blood mononuclear cells | ~1.4 ATA 1 hour                                 |
| Wang et al. 2021                      | Immunostaining and western blot                              | HBO <sub>2</sub> decreased HIF-1 $\alpha$ protein expression compared to injured controls. Levels remained higher than healthy controls.     | Relative hypoxic, acute inflammation   | Cerebral ischemia reperfusion injury | 8                                          | In vivo rat model                                         | 1.5 ATA 3 days 1,5 hours/day                    |
| Yuan et al. 2021                      | Western blot                                                 | HBO <sub>2</sub> reduced the disease induced HIF-1 $\alpha$ protein expression compared to controls.                                         | Relative hypoxic, acute inflammation   | Pulmonary fibrosis                   | 3                                          | Ex vivo study of human lung fibroblast                    | 2.5 ATA 14 days 1,5 hours/day                   |
| Zhang et al. 2021                     | Quantitative PCR analysis of the HIF-1 $\alpha$ target genes | HBO <sub>2</sub> downregulated cancer induced HIF-1 $\alpha$ signaling.                                                                      | Hypoxic, acute inflammation            | Non-small-cell-lung cancer           | 6                                          | Ex vivo study of hypoxic cell lines                       | 3 ATA 1,5 hours                                 |
| Harnanik et al. 2020 (Infect Dis Rep) | Immunohistochemistry                                         | HBO <sub>2</sub> decreased HIF-1 $\alpha$ protein expression compared to controls.                                                           | Relative hypoxic, chronic inflammation | Rheumatoid arthritis                 | 16                                         | In vivo mouse model                                       | 2.4 ATA 10 days 1,5 hours/day, incl 2 airbreaks |

|                                   |                                             |                                                                                                                                                                       |                                        |                                     |                          |                                             |                                                                   |
|-----------------------------------|---------------------------------------------|-----------------------------------------------------------------------------------------------------------------------------------------------------------------------|----------------------------------------|-------------------------------------|--------------------------|---------------------------------------------|-------------------------------------------------------------------|
| Harnanik et al. 2020 (Oman Med J) | Immunohistochemistry                        | HIF-1 $\alpha$ protein expression decrease in response to HBO <sub>2</sub> in both treatment schedules compared to controls.                                          | Relative hypoxia, acute inflammation   | Model of rheumatoid arthritis       | 16                       | In vivo mouse model                         | 2.4 ATA<br>10 or 5+5 days<br>1,5 hours/day, incl 2 airbreaks      |
| Huang et al. 2020                 | Quantitative-PCR and Western blotting.      | HIF-1 $\alpha$ mRNA and protein level increased progressively in response to HBO <sub>2</sub> compared to diseased controls.                                          | Normoxic, acute inflammation           | Diabetic model                      | 3                        | Ex vivo human skin fibroblast               | 2.5 ATA<br>1, 2 or 3 days<br>1,5 hours/day                        |
| Huang et al. 2020                 | Quantitative-PCR and Western blotting.      | HIF-1 $\alpha$ mRNA and protein level increased in response to HBO <sub>2</sub> compared to diseased controls.                                                        | Relative hypoxic, chronic inflammation | Diabetic foot animal model          | 3                        | In vivo mouse model                         | 2.0 ATA<br>30 days<br>1 hour/day                                  |
| Mihaljevic et al. 2020            | Real-time quantitative PCR and Western blot | Expression of HIF-1 $\alpha$ mRNA and proteins levels were significantly increased in response to HBO <sub>2</sub> at both time points compared to untreated controls | Normoxic, non-inflamed aortic tissue   | Vascular reactivity                 | 6 (PCR) 8 (western blot) | Ex vivo aortic rings from rats              | 2.0 ATA<br>After 24 hours and 4 days<br>2 hours/day               |
| Salmon-Gonzales et al. 2020       | Real time-Quantitative-PCR                  | HBO <sub>2</sub> did not affect HIF-1 $\alpha$ mRNA expression.                                                                                                       | Normoxic, non-inflammatory             | Bone metabolism                     | Not specified            | Ex vivo study of human osteoblast cell line | 2.3 ATA<br>1, 3 or 5 days<br>1,5 hours/day                        |
| Yamamoto et al. 2020              | Real time-quantitative-PCR, ELISA           | HBO <sub>2</sub> did not affect HIF-1 $\alpha$ mRNA levels, but increased HIF-1 $\alpha$ protein expression compared to injured controls.                             | Relative hypoxic, acute inflammation   | Muscle regeneration after contusion | 6                        | In vivo rat model                           | 2.5 ATA<br>5 days<br>2 hours/day                                  |
| Utami et al. 2020                 | Immunohistochemistry                        | HBO <sub>2</sub> decreased HIF-1 $\alpha$ protein expression compared to disease induced controls. Levels remained higher than healthy controls.                      | Relative hypoxic, acute inflammation   | Cerebral malaria                    | 13                       | In vivo mouse model                         | 2.4 ATA<br>10 days<br>1,5 hours/day, incl 2 airbreaks             |
| Anguiano-Hernandez et al 2019     | Immunohistochemistry                        | HBO <sub>2</sub> did not change HIF-1 $\alpha$ protein expression compared to before HBO <sub>2</sub> . No control group.                                             | Relative hypoxic, chronic inflammation | Diabetic foot ulcers                | 18                       | In vivo study of human wound tissue         | 1.4 ATA<br>20 days,<br>5/week<br>1 x 45 min/day                   |
| Ergozen et al. 2019               | PCR                                         | HBO <sub>2</sub> treatment increased HIF-1 $\alpha$ mRNA expression compared to before intervention.                                                                  | Relative hypoxic, chronic inflammation | Diabetic ulcers                     | 20                       | In vivo study of human skin biopsies        | 2.5 ATA<br>10 days,<br>5/week<br>1 x 85 min/day, incl 2 airbreaks |
| Harnanik et al. 2019              | Immunohistochemistry                        | HBO <sub>2</sub> decreased HIF-1 $\alpha$ protein expression compared to disease induced controls.                                                                    | Relative hypoxic, chronic inflammation | Rheumatoid arthritis                | 10                       | In vivo mouse model                         | 1.7 ATA<br>10 days<br>1,5 hours/day, incl 2 airbreaks             |
| Hsu et al. 2019                   | Immunofluorescence and western blot         | HBO <sub>2</sub> increased HIF-1 $\alpha$ protein expression compared to healthy and ischemic controls evaluated 9 days after intervention.                           | Relative hypoxic, chronic inflammation | Critical-limb ischemia              | 8                        | In vivo rat model                           | 2.4 ATA<br>5 days<br>3 hours/day                                  |

|                        |                                                                                |                                                                                                                                                                           |                                        |                                                       |                                                       |                                           |                                                    |
|------------------------|--------------------------------------------------------------------------------|---------------------------------------------------------------------------------------------------------------------------------------------------------------------------|----------------------------------------|-------------------------------------------------------|-------------------------------------------------------|-------------------------------------------|----------------------------------------------------|
| Lin et al. 2018        | ELISA                                                                          | HIF-1 $\alpha$ protein expression decreased progressively from 1 to 3 treatments.                                                                                         | Hypoxic, chronic inflammation          | Peripheral arterioclerotic arterial occlusive disease | 57 for each time interval                             | In vivo study of human blood              | 2.5 ATA<br>1, 2 or 3 days<br>2 hours/day           |
| Song et al. 2018       | Immunohistochemistry                                                           | HIF-1 $\alpha$ protein expression decrease in response to HBO <sub>2</sub> compared to controls                                                                           | Relative hypoxic, chronic inflammation | Keloid                                                | 8                                                     | In vivo study of human tissue             | 2.0 ATA<br>20 days or more<br>2 hours/day          |
| Zembrzuska et al. 2019 | ELISA                                                                          | HBO <sub>2</sub> increases HIF-1 $\alpha$ protein expression levels compared to disease induced controls.                                                                 | Normoxic, chronic inflammation         | Glioblastoma                                          | Not specified                                         | Ex vivo study of human glioblastoma cells | 2.0 ATA<br>1 hour                                  |
| Zhang et al. 2018      | Real time-quantitative - PCR, immunofluorescence staining and western blotting | HBO <sub>2</sub> decreased HIF-1 $\alpha$ protein expression compared to diseased controls. Levels remained higher than healthy controls.                                 | Relative hypoxic, chronic inflammation | Keloid scars                                          | 9                                                     | In vivo study of human tissue             | 2.0 ATA<br>7 days<br>1 hour/day                    |
| Ravaioli et al. 2018   | Gene expression analysis and gene mapping                                      | HBO <sub>2</sub> decreased HIF-1 $\alpha$ mRNA expression (non-significant) compared to untreated controls.                                                               | Hypoxic, non-inflammation              | Kidney transplantation                                | 4                                                     | (Ex vivo) Post mortem donor kidneys       | 1.5 ATA<br>1 HBO session<br>Duration not specified |
| Li et al. 2017         | Western blot                                                                   | HBO <sub>2</sub> decreased injury-induced elevated levels of HIF-1 $\alpha$ protein expression. Levels remained higher than healthy controls.                             | Relative hypoxic, chronic inflammation | Arteriovenous fistula                                 | 32 (sham) + 32 (diseased)                             | In vivo rabbit model                      | 2.5 ATA<br>20 days<br>1 hour/day                   |
| Gang Wang et al. 2017  | Immunohistochemistry                                                           | HBO <sub>2</sub> decreased HIF-1 $\alpha$ protein expression compared to controls.                                                                                        | Relative hypoxic, acute inflammation   | Periodontitis                                         | 12                                                    | In vivo rat at model                      | 2.5 ATA<br>14 days<br>1 hour/day                   |
| Novak et al. 2016      | Real-Time PCR                                                                  | HBO <sub>2</sub> increased HIF-1 $\alpha$ mRNA expression when comparing to both diseased and healthy controls. No effect was observed in healthy controls.               | Relative hypoxic, acute inflammation   | Model of induced colitis                              | 4                                                     | In vivo mouse model                       | 2.4 ATA<br>15 days<br>2 x 1 hour/day               |
| Lu et al. 2016         | Immunohistochemistry and western blot                                          | HIF-1 $\alpha$ protein expression decreased in response to HBO <sub>2</sub> in both chemotherapy treated and untreated glioma mice compared to their respective controls. | Relative hypoxic, chronic inflammation | Healthy mice inoculated with human glioma cells       | 5 (glioma mice) and 5 (Nimustine treated glioma mice) | In vivo mouse model                       | 2.5 ATA<br>21 days<br>1,5 hours/day                |
| Ding et al. 2015       | Immunohistochemistry                                                           | HBO <sub>2</sub> increased HIF-1 $\alpha$ protein expression compared to controls.                                                                                        | Relative hypoxic, acute inflammation   | Intracranial glioma                                   | 5                                                     | In vivo rat model                         | 3.0 ATA<br>12 days<br>1 hour every second day      |
| Parra et al. 2015      | Immunohistochemistry                                                           | HBO <sub>2</sub> reduced disease increased HIF-1 $\alpha$ protein expression compared to healthy controls.                                                                | Hypoxic, acute inflammation            | Animal models with or without colitis                 | 7 (colitis) 7 (healthy)                               | In vivo rat model                         | 2,0 ATA<br>2 days<br>2 hours/day                   |
| Zhou et al. 2015       | Western blot                                                                   | HBO <sub>2</sub> reduced the injury induced HIF-1 $\alpha$ protein expression compared to controls.                                                                       | Hypoxic, acute inflammation            | Intracerebral hemorrhage                              | 6                                                     | In vivo mouse model                       | 3.0 ATA<br>1 hour                                  |

|                        |                                                                                           |                                                                                                                                                                                                                                                   |                                        |                                    |               |                                                            |                                                                               |
|------------------------|-------------------------------------------------------------------------------------------|---------------------------------------------------------------------------------------------------------------------------------------------------------------------------------------------------------------------------------------------------|----------------------------------------|------------------------------------|---------------|------------------------------------------------------------|-------------------------------------------------------------------------------|
| Hu et al. 2014         | Western blot and ELISA                                                                    | Delayed HBO <sub>2</sub> significantly increased HIF-1 $\alpha$ protein expression compared to injured and healthy controls.                                                                                                                      | Normoxic, chronic inflammation         | Late-chronic phase of stroke       | 7             | In vivo rat model                                          | 2.5 ATA<br>7 days<br>1,5 hours/day                                            |
| Yildirim et al. 2014   | Unspecified (routine biochemistry)                                                        | HBO <sub>2</sub> decreased HIF-1 $\alpha$ protein expression in soft tissue after first treatment session compared to injured controls, but the difference was not significant after 2 sessions. Plasma levels of HIF-1 $\alpha$ were unaffected. | Relative hypoxic, acute inflammation   | Soft tissue trauma                 | 7+7+7         | In vivo study of tissue and blood samples in a rat model   | 2.5 ATA<br>3 days<br>2 hours/day                                              |
| Sunkari et al. 2014    | Immunoblot, reporter gene assay and quantitative real time PCR for target gene expression | HBO <sub>2</sub> stabilized and activated HIF-1 $\alpha$ and increased the HRE driven luciferase response as well as mRNA expression of target genes.                                                                                             | Relative hypoxic, chronic inflammation | Diabetic wounds                    | 5             | Ex vivo study of human dermal fibroblasts                  | 2.5 ATA<br>1 hour                                                             |
| Yang et al. 2014       | Immunohistochemistry and western blot                                                     | HBO <sub>2</sub> reduced injury induced HIF-1 $\alpha$ protein expression. Levels remained higher than healthy controls.                                                                                                                          | Hypoxic, acute inflammation            | Induced traumatic brain injury     | 90            | In vivo rat model                                          | 1.5 ATA<br>15 days<br>1,5 hours/day                                           |
| Al Hadi et al. 2013    | Real time-quantitative-PCR and western blot                                               | HBO <sub>2</sub> decreased disease mediated elevated levels of HIF-1 $\alpha$ mRNA and protein expression. Levels were lower than normoxic controls.                                                                                              | Hypoxic, chronic inflammation          | Osteonecrosis                      | Not specified | Ex vivo study human Peripheral Blood Monocytes             | 2.4 ATA<br>12 days<br>1,5 hours/day                                           |
| Zhou et al. 2013       | Quantitative PCR, Immunofluorescence and Western blot                                     | HBO <sub>2</sub> decreased the disease mediated expression of HIF-1 $\alpha$ mRNA and protein after 3 sessions, as compared to injured controls. Levels remained higher than healthy controls. No effect on healthy controls.                     | Relative hypoxic, acute inflammation   | Animal model of spinal cord injury | 40            | In vivo rat model                                          | 2.0 ATA<br>2,6,10 or 17 days<br>2 x 1 hour/day the first 3 days then once/day |
| Chen et al. 2012       | Real time-quantitative PCR                                                                | HBO <sub>2</sub> did not affect mRNA expressions levels in any of the tissue types.                                                                                                                                                               | Relative hypoxic, acute inflammation   | Wound healing                      | 5 + 5         | In vivo mice model of wounds in skin and mucosa            | 2.5 ATA<br>2 or 4 days<br>2 x 2 hours/day (1 hour apart)                      |
| Sakata et al. 2010     | Immunohistochemistry                                                                      | HBO <sub>2</sub> decreased HIF-1 $\alpha$ protein expression compared to untreated controls.                                                                                                                                                      | Relative hypoxic, acute inflammation   | Intraportal islet transplantation  | 2             | In vivo study of liver islets from mouse model of diabetes | 2.5 ATA<br>3 days<br>2 x 1 hour/day                                           |
| Bai et al. 2009        | Immunohistochemistry and Western blotting                                                 | HBO <sub>2</sub> significantly reduced disease-induced HIF-1 $\alpha$ proteins expression compared to diseased controls. HIF-1 $\alpha$ remained higher than healthy controls.                                                                    | Relative hypoxic, acute inflammation   | Model of acute pancreatitis        | 10            | In vivo rat model                                          | 2.6 ATA<br>1,5 hour                                                           |
| Milovanova et al. 2009 | Western blot                                                                              | HBO <sub>2</sub> increased HIF protein expression compared to controls in both blood and bone marrow.                                                                                                                                             | Normoxic, non-inflammation             | Vasculogenic stem cell growth      | 4             | In vivo mouse model                                        | 2.8 ATA<br>2, 5 or 10 days<br>2 x 1,5 hours (12 hours apart)                  |

|                       |                                                                               |                                                                                                                                                                                                                                               |                                      |                                                         |                                          |                                    |                                                    |
|-----------------------|-------------------------------------------------------------------------------|-----------------------------------------------------------------------------------------------------------------------------------------------------------------------------------------------------------------------------------------------|--------------------------------------|---------------------------------------------------------|------------------------------------------|------------------------------------|----------------------------------------------------|
| Gu et al. 2008        | Western blotting, HIF-1 $\alpha$ DNA-binding, Real time-PCR.                  | HBO <sub>2</sub> increased HIF-1 $\alpha$ protein expression and HIF-1 $\alpha$ DNA-binding, as well as the HIF target gene EPO compared with to healthy controls.                                                                            | Normoxic, non-inflammation           | Rat focal cerebral ischemic model                       | 5(western blot) 6 (DNA-binding)          | In vivo rat model                  | 2.0 ATA<br>5 treatments<br>1 hour every second day |
| Peng et al. 2008      | Immunohistochemistry and western blot                                         | HIF-1 $\alpha$ protein expression was higher at all timepoints in HBO <sub>2</sub> group compared to controls, with maximum at day 3.                                                                                                         | Normoxic, non-inflammation           | Animal model of hypoxia                                 | 8                                        | In vivo mouse model                | 2,5 ATA<br>2, 6 or 10 days<br>2 x 1 hour/day       |
| Ren et al. 2008       | Real time - QuantitativePCR, western blot and ELISA-based kit for DNA binding | No significant differences in HIF-1 $\alpha$ mRNA expression, but HBO <sub>2</sub> increased the expression of HIF-1 $\alpha$ protein and DNA binding in healthy rats compared to untreated controls.                                         | Normoxic, non-inflammation           | Model of liver regeneration after resection.            | 6 (PCR) 5 (DNA binding) 6 (western blot) | In vivo rat model                  | 2.5 ATA<br>3 days<br>1 hour/day                    |
| Sun et al. 2008       | Immunoblotting                                                                | HBO <sub>2</sub> reduced the injury-induced expression of HIF-1 $\alpha$ protein compared to controls.                                                                                                                                        | Hypoxic, acute inflammation          | Stroke model with experimental cerebral ischemia        | 5                                        | In vivo mouse model                | 3.0 ATA<br>95 min                                  |
| Zhang et al. 2008     | Western blot                                                                  | HBO <sub>2</sub> decreased HIF-1 $\alpha$ protein expression at day 7 compared to healthy controls. Levels were equally high between the two groups after 10 treatments.                                                                      | Hypoxic, acute inflammation          | Ischemic wound tissue                                   | 6                                        | In vivo rat model                  | 2.4 ATA<br>3, 7, 10 or 14 days<br>1,5 hours/day    |
| Huang et al. 2007     | Immunohistochemistry and western blot                                         | HBO <sub>2</sub> decreased injury-induced elevated levels of HIF-1 $\alpha$ protein expression. Levels remained higher than healthy controls.                                                                                                 | Hypoxic, acute inflammation          | Focal cerebral ischemia                                 | 8                                        | In vivo rat model                  | 2.5 ATA<br>2 hours                                 |
| Calvert et al. 2006   | Western blot                                                                  | HBO <sub>2</sub> significantly reduced HIF-1 $\alpha$ protein expression compared to diseased controls. Levels remained higher than healthy controls.                                                                                         | Hypoxic, acute inflammation          | Induced hypoxic ischemic cerebral insult                | 30                                       | In vivo rat model                  | 2.5 ATA<br>2 hours                                 |
| Salhanick et al. 2006 | DNA-binding Assay, Transient transfection assays                              | HBO <sub>2</sub> increased HIF-1 $\alpha$ DNA binding activity, but not transcriptional activity of HIF target genes.                                                                                                                         | Relative hypoxic, acute inflammation | Acetaminophen poisoning                                 | 3                                        | Ex vivo study of human hepatocytes | 2.5 ATA<br>1,5 hours                               |
| Salhanick et al. 2006 | Western blot                                                                  | HBO <sub>2</sub> upregulated disease-induced HIF-1 $\alpha$ protein expression compared to controls.                                                                                                                                          | Relative hypoxic, acute inflammation | Acetaminophen poisoning                                 | 3                                        | In vivo mouse model                | 2.5 ATA<br>1,5 hours                               |
| Li et al. 2005        | Immunohistochemistry and Western blotting                                     | HBO <sub>2</sub> reduced the injury-mediated high levels of HIF-1 $\alpha$ protein expression at all time points compared to ischemic controls with a maximum at 96 hours. The level of HIF-1 $\alpha$ remained higher than healthy controls. | Hypoxic, acute inflammation          | Model of transient global cerebral ischemia—hypotension | 2(immunohistochemistry) 4(western blot)  | In vivo rat model                  | 3.0 ATA<br>2 hours                                 |

|                       |                                                                     |                                                                                                                                                                      |                             |                                      |    |                   |                   |
|-----------------------|---------------------------------------------------------------------|----------------------------------------------------------------------------------------------------------------------------------------------------------------------|-----------------------------|--------------------------------------|----|-------------------|-------------------|
| Ostrowski et al. 2005 | Western blot, Immunohistochemistry, and double fluorescent staining | HBO <sub>2</sub> decreased injury-induced HIF-1 $\alpha$ proteins expression compared to injured controls. HIF-1 $\alpha$ remained at the level of healthy controls. | Hypoxic, acute inflammation | Rat model of subarachnoid hemorrhage | 14 | In vivo rat model | 2.8 ATA<br>2 hour |
|-----------------------|---------------------------------------------------------------------|----------------------------------------------------------------------------------------------------------------------------------------------------------------------|-----------------------------|--------------------------------------|----|-------------------|-------------------|

**Table S2 – Studies on the effect of hyperbaric oxygen treatment on NF- $\kappa$ B**

| Study                          | Method                                                              | Outcome                                                                                                                                                                             | O <sub>2</sub> Environment             | Disease under study                     | No. of objects exposed to HBO <sub>2</sub> | Specimen                                 | HBO treatment                                         |
|--------------------------------|---------------------------------------------------------------------|-------------------------------------------------------------------------------------------------------------------------------------------------------------------------------------|----------------------------------------|-----------------------------------------|--------------------------------------------|------------------------------------------|-------------------------------------------------------|
| Syahrizal et al. 2022          | Immunohistochemistry                                                | HBO <sub>2</sub> had no significant effect on NF- $\kappa$ B protein expression compared to disease-induced controls.                                                               | Relative hypoxic, chronic inflammation | Endometriosis                           | 8                                          | In vivo mouse model                      | 2.4 ATA<br>10 days<br>1,5 hours/day<br>(2 air-breaks) |
| Wang et al. 2022               | Immunofluorescence-staining and western blot                        | HBO <sub>2</sub> decreased disease-induced elevated levels of NF- $\kappa$ B and NF- $\kappa$ B-p65 protein expression. Levels remained higher than health controls.                | Relative hypoxic, chronic inflammation | Brain senescence                        | 3                                          | In vivo mouse model                      | 2.0 ATA<br>14 days<br>1 hour/day                      |
| Chen et al. 2021               | Immunofluorescence and Western blot                                 | HBO <sub>2</sub> decreased injury-induced elevated levels of NF- $\kappa$ B protein expression. Levels remained higher than healthy controls.                                       | Relative hypoxic, chronic inflammation | Burn injury                             | 6                                          | In vivo rat model                        | 2.5 ATA<br>14 days<br>1,5 hours/day                   |
| Fratantonio et al. 2021        | Western blot                                                        | HBO <sub>2</sub> significantly increased NF- $\kappa$ B protein expression 30 minutes and 3 hour after HBO <sub>2</sub> exposure. Levels were normalized after 24 hours.            | Normoxic, non-inflammatory             | Healthy subjects                        | 4                                          | In vivo study of human mononuclear cells | 1.4 ATA<br>1 hour                                     |
| Huang et al. 2020              | Quantitative-PCR and Western blotting                               | Relative NF- $\kappa$ B mRNA and protein levels increased in response to HBO <sub>2</sub> compared to disease-induced controls.                                                     | Normoxic, acute inflammation           | Diabetic model                          | 3                                          | Ex vivo human skin fibroblast            | 2.5 ATA<br>1, 2 or 3 days<br>1,5 hours/day            |
| Huang et al. 2020              | Quantitative-PCR and Western blotting                               | NF- $\kappa$ B mRNA and protein levels increased in response to HBO <sub>2</sub> compared to injured controls.                                                                      | Relative hypoxic, chronic inflammation | Diabetic foot animal model              | 3                                          | In vivo mouse model                      | 2.0 ATA<br>30 days<br>1 hour/day                      |
| Ko et al. 2020                 | Immunohistochemical and immunofluorescent staining and western blot | HBO <sub>2</sub> decreased disease-induced elevated levels of NF- $\kappa$ B protein expression. Levels remained higher than healthy controls.                                      | Hypoxic, acute inflammation            | Acute renal ischemia-reperfusion injury | 10 +10                                     | In vivo rat model                        | 2.4 ATA<br>3 days<br>1,5 hours/day                    |
| Liang et al. 2020              | Real time-PCR, immunohistochemistry and Western blot                | HBO <sub>2</sub> decreased injury-induced elevated levels of NF- $\kappa$ B mRNA and protein expression in the 1.6 ATA treatment group when applied until 6 hours after the trauma. | Relative hypoxic, acute inflammation   | Traumatic brain injury                  | 30 or 30                                   | In vivo rat model                        | 1.6 ATA or<br>2.2 ATA<br>14 days<br>1 hour/day        |
| Anguiano-Hernandez et al. 2019 | Immunohistochemistry                                                | Insignificant decrease in NF- $\kappa$ B protein expression compared to before HBO <sub>2</sub> . No control group.                                                                 | Relative hypoxic, chronic inflammation | Diabetic foot ulcers                    | 36                                         | In vivo study of human wound tissue      | 1.4 ATA<br>20 days<br>1,5 hours/day                   |
| Sun et al. 2019                | ELISA                                                               | HBO <sub>2</sub> decreased NF- $\kappa$ B protein expression after 3 to 30 days.                                                                                                    | Relative hypoxic, acute inflammation   | Spinal cord injury                      | 41                                         | In vivo study of human plasma            | 2.0 ATA<br>1, 3, 7, 10 or<br>30 days<br>1 hour/day    |

|                    |                                                                |                                                                                                                                                                     |                                        |                                                 |                                                       |                                                           |                                                                                 |
|--------------------|----------------------------------------------------------------|---------------------------------------------------------------------------------------------------------------------------------------------------------------------|----------------------------------------|-------------------------------------------------|-------------------------------------------------------|-----------------------------------------------------------|---------------------------------------------------------------------------------|
| Song et al. 2018   | Immuno-histo-chemistry                                         | NF-kB protein expression decreased in response to HBO <sub>2</sub> compared to controls.                                                                            | Relative hypoxic, chronic inflammation | Keloid tissue                                   | 8                                                     | In vivo study of human tissue                             | 2.0 ATA<br>20 days or more<br>2 hours/day                                       |
| Lu et al. 2016     | Immuno-histo-chemistry and western blot                        | NF-kB protein expression decreased in response to HBO <sub>2</sub> in both chemotherapy treated, and untreated glioma mice compared to their respective controls.   | Relative hypoxic, chronic inflammation | Healthy mice inoculated with human glioma cells | 5 (glioma mice) and 5 (Nimustine treated glioma mice) | In vivo mouse model                                       | 2.5 ATA<br>21 days<br>1,5 hours/day                                             |
| Meng et al. 2016   | Western blot                                                   | HBO <sub>2</sub> decreased injury-induced elevated levels of NF-kB-p65 protein expression compared to controls. Levels remained higher than healthy controls.       | Relative hypoxic, acute inflammation   | Secondary brain injury after trauma             | 10                                                    | In vivo rat model                                         | 1.2 ATA<br>2 sessions<br>2 x 1 hours<br>(10 hours apart)                        |
| Kang et al. 2015   | ELISA                                                          | HBO <sub>2</sub> decreased injury-induced elevated levels of NF-kB protein expression after 2 to 7 days of treatment. Levels remained higher than healthy controls. | Relative hypoxic, acute inflammation   | Spinal cord injury                              | 6 in each group                                       | In vivo rat model                                         | 2.5 ATA<br>1, 2, 3, 7 or 14 days<br>1 x 45 min/day                              |
| Tan et al. 2014    | Real time PCR and western blot                                 | HBO <sub>2</sub> decreased injury-induced elevated levels of NF-kB-p65 protein expression after 1 to 7 days of treatment.                                           | Relative hypoxic, acute inflammation   | Spinal cord injury                              | 6 in each group                                       | In vivo rat model                                         | 2.0 ATA<br>1, 2, 3, 7 or 14 days<br>1 hour/day                                  |
| Liang et al. 2013  | Immuno-histo-chemistry and western blot                        | HBO <sub>2</sub> decreased injury-induced elevated levels of NF-kB protein expression. Levels remained higher than healthy controls.                                | Hypoxic, acute inflammation            | Epigastric skin flap grafting                   | 7 (6 sessions) or 7 (8 sessions)                      | In vivo rat model                                         | 2.0 ATA<br>6 or 8 days<br>2 x 1 hour for 3 days, then 1 hour for 2 days         |
| Yang et al. 2013   | Real time-PCR, immuno-histo-chemical staining and western blot | HBO <sub>2</sub> decreased injury-induced elevated levels of NF-kB mRNA and protein expression levels at day 3, 7, and 14.                                          | Relative hypoxic, acute inflammation   | Spinal cord injury                              | 6-10 per group                                        | In vivo rat model                                         | 2.5 ATA<br>2, 6, 10 or 17 days<br>2 x 45 min for 3 days, thereafter 45 min/day. |
| Madden et al. 2011 | ELISA                                                          | HBO <sub>2</sub> increased NF-kB protein expression after 4 hours in comparison to before HBO <sub>2</sub> .                                                        | Normoxic, non-inflammatory             | Healthy humans.                                 | 10                                                    | In vivo study of human peripheral blood mononuclear cells | 2.8 ATA<br>1 hour                                                               |
| Yu et al. 2009     | Electrophoretic mobility shift assay                           | HBO <sub>2</sub> decreased the DNA binding activity of NF-kB compared to disease-induced controls. Levels remained higher than healthy controls.                    | Relative hypoxic, acute inflammation   | Acute pancreatitis                              | 40                                                    | In vivo study of rat peripheral blood                     | 2.4 ATA (90% O <sub>2</sub> )<br>1 session of 1, 3, 5 or 7 hours                |
| Sakoda et al. 2004 | Immuno-histo-chemistry                                         | HBO <sub>2</sub> decreased the mucosal nuclear factor-B activation within 4–6 hours after LPS stimulation.                                                          | Relative hypoxic, acute inflammation   | Intestinal mucosal injury                       | 1                                                     | In vivo Lipopolysaccharid rat model                       | 2.5 ATA<br>1 hour                                                               |
